# Supplementary material
Source: publisher figshare collection journal article supplement (https://adisjournals.figshare.com/articles/dataset/_/21221468)
Supplement: Supplementary file 1 [file 1]

# ROTAVIRUS VACCINE IMPACT SINCE ITS INTRODUCTION IN THE NATIONAL IMMUNIZATION PROGRAM OF ARGENTINA

Garcia Marti S, Gibbons L, Reidel S, Stupka J, Degiuseppe J, Argento F, Gómez JA

**Rotavirus vaccine** has contributed to the decline in the number of diarrhea cases and hospitalizations in **Argentina**

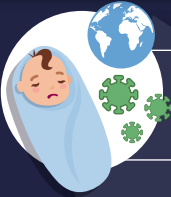

**ROTAVIRUS IS A VERY CONTAGIOUS VIRUS THAT CAUSES DIARRHEA** in infants and children worldwide.

**ROTAVIRUS INFECTION RECOVERY** happens at home for most children. While cases of severe rotavirus diarrhea frequently leads to hospitalization.

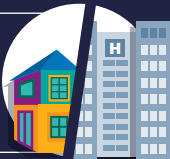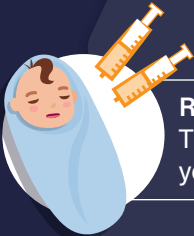

**ROTAVIRUS CAN BE PREVENTED THROUGH VACCINATION**  
The vaccine is important for generating immunity in the first years of life. The vaccine is given orally in a two-dose schedule.

This time-series analyses aims to evaluate the impact of Rotavirus vaccine implementation on the burden of acute diarrheal disease, rotavirus diarrhea and hospitalizations.

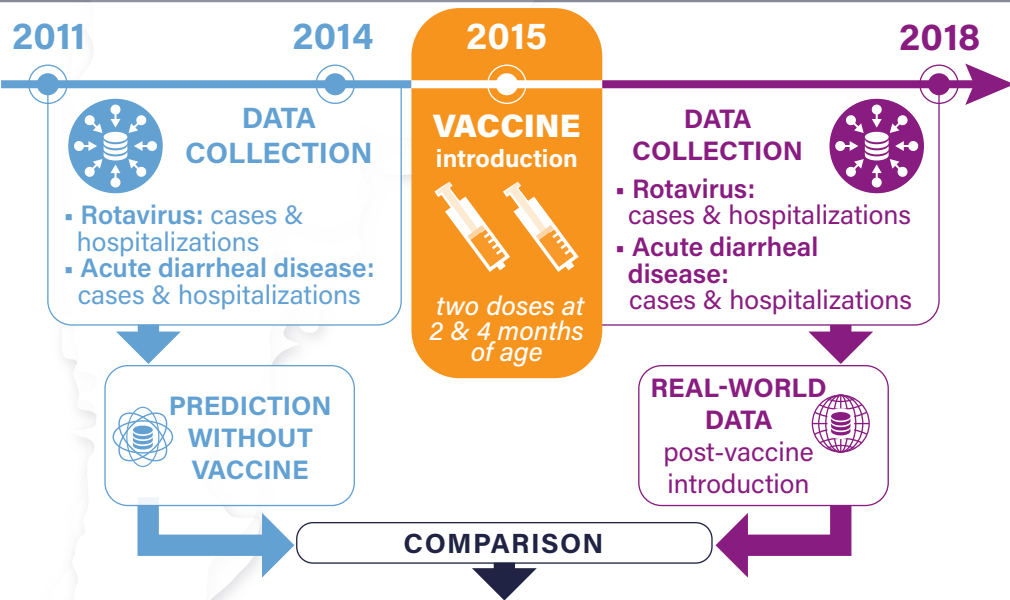

## ROTAVIRUS VACCINE IMPACT

Acute diarrheal disease trends following rotavirus vaccination in children aged less than 2 years old

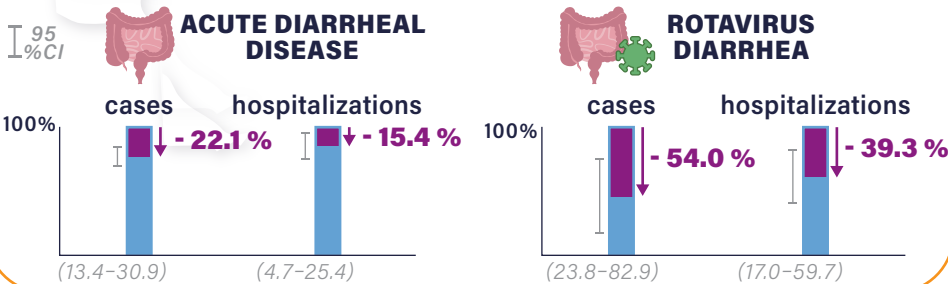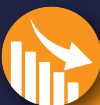

This study shows a **significant reduction in diarrhea cases and rotavirus cases and hospitalizations** in children under 2 years of age

The graphical abstract represents the opinions of the authors. For a full list of declarations, including funding and author disclosure statements, and copyright information, please see the full text online.
